# Supplementary material
Source: MDPI journal article supplement (https://www.mdpi.com/search?q=antioxidants-09-00504)
Supplement: s001 [file antioxidants-09-00504-s001.pdf]

# Superior Antioxidant Capacity of *Berberis iliensis*–HPLC-Q-TOF-MS Based Phytochemical Studies and Spectrophotometric Determinations

Saniia Abdykerimova <sup>1</sup>, Zuriyadda Sakipova <sup>1</sup>, Sylwia Nakonieczna <sup>2</sup>, Wojciech Koch <sup>3</sup>, Anna Biernasiuk <sup>4</sup>, Aneta Grabarska <sup>5</sup>, Anna Malm <sup>4</sup>, Kaldanay Kozhanova <sup>1</sup>, Wirginia Kukula-Koch <sup>2,\*</sup>

<sup>1</sup> School of Pharmacy, S.D. Asfendiyarov Kazakh National Medical University, Tole-bi 94, 050012 Almaty, Kazakhstan; abdykerimova.s@kaznmu.kz (S.A.), sakipova.z@kaznmu.kz (Z.S.); kozhanova.k@kaznmu.kz (K.K.)

<sup>2</sup> Chair and Department of Pharmacognosy, Medical University of Lublin; 1, Chodzki str., 20-093 Lublin, Poland; sylwia.nakonieczna2@gmail.com (S.N.); virginia.kukula@gmail.com (W.K.-K.)

<sup>3</sup> Chair and Department of Food and Nutrition, Medical University of Lublin, 4a, Chodźki str., 20-093 Lublin, Poland; kochw@interia.pl (W.K.)

<sup>4</sup> Department of Pharmaceutical Microbiology with Laboratory for Microbiological Diagnostics, Medical University of Lublin, 1, Chodzki str., Lublin 20-093, Poland; anna.biernasiuk@umlub.pl (A.B.); anna.malm@umlub.pl (A.M.)

<sup>5</sup> Department of Biochemistry and Molecular Biology, Medical University of Lublin, 1, Chodzki str., 20-093 Lublin, Poland; aneta.grabarska@umlub.pl (A.G.)

\* Correspondence: virginia.kukula@gmail.com; Tel.: +48814487087

**Figure S1.** An example of the antimicrobial assay performed by the microdilution method (MIC) and agar plate assay (MBC) (L – extract from leaves, F-extract from fruits of *Berberis iliensis*)

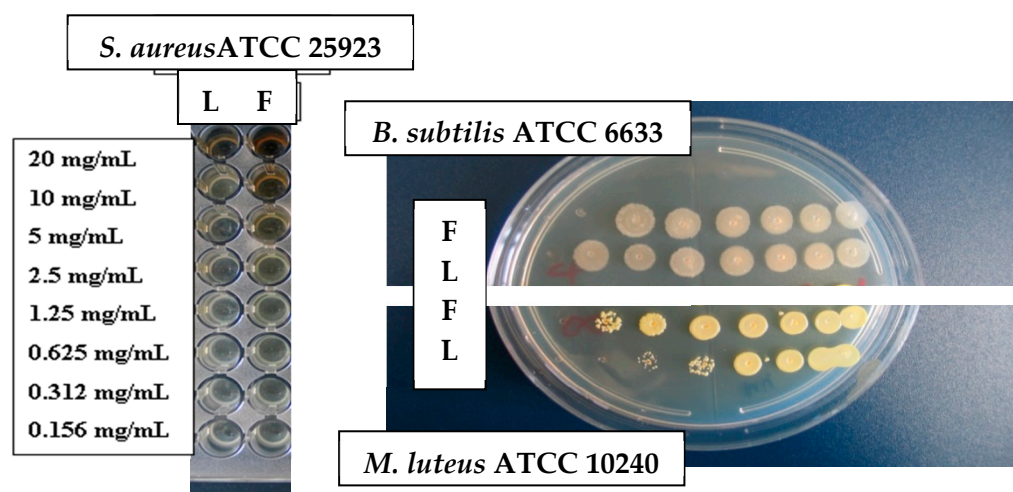

Figure S2. The structures of the metabolites present in the extracts

**Alkaloids**

Berberine

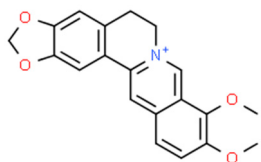

Palmatine

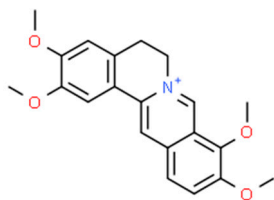

Jatrorhizine

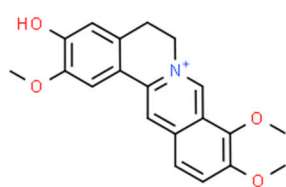

N-methylcoclaurine

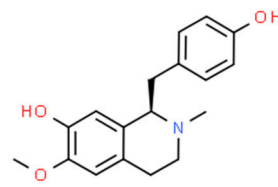

Magnoflorine

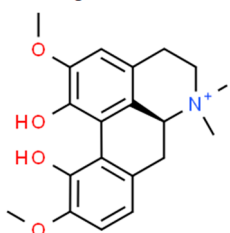

Demethyleneberberine

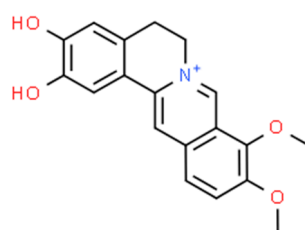

Berberrubine

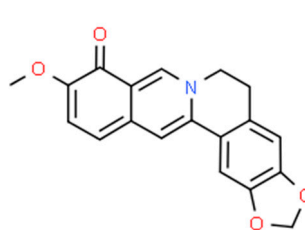

Berbamunine

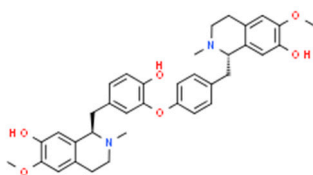

Obaberine

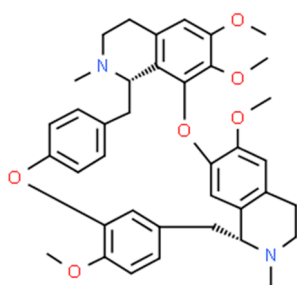

Oxyacanthine

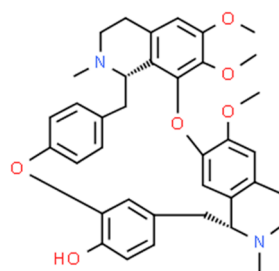

Berbamine

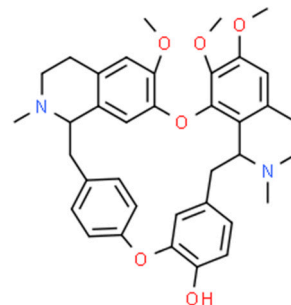

**Phenolic compounds**

Syringic acid

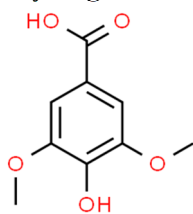

(Z)-chlorogenic acid

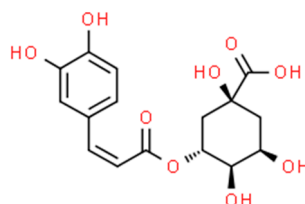

Neochlorogenic acid

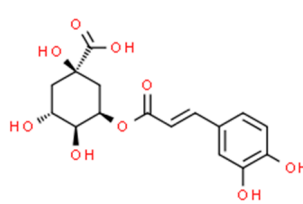

Chlorogenic acid

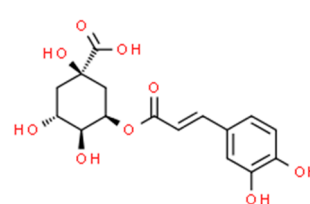

Hydroxybenzoic acid  
isomers

Caffeic acid

Coumaroyl-quinic acid  
isomers

Rosmarinic acid

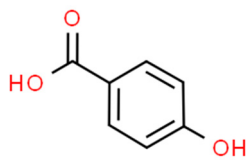

Galloyl-glucose

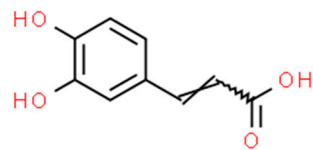

5-Caffeoylglucaric acid

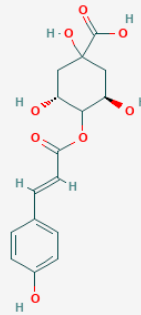

3-Caffeoylglucaric acid

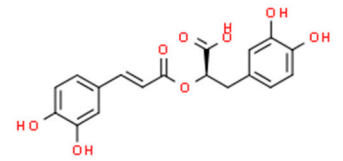

4-Caffeoylglucaric acid

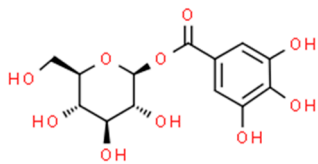

2-Caffeoylglucaric acid

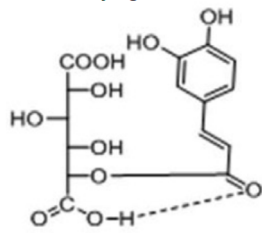

Syringaldehyde

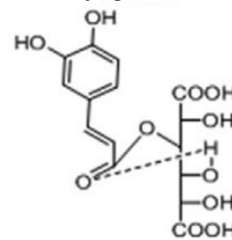

Rutin

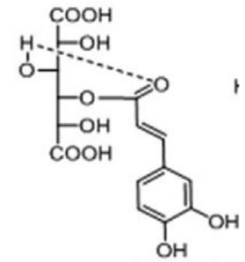

Quercetin

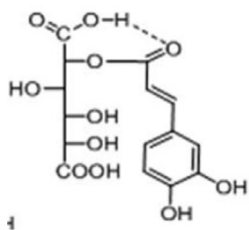

Isoquercetin

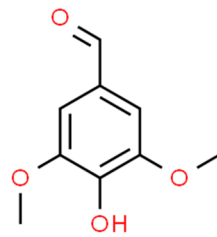

Guajaverin

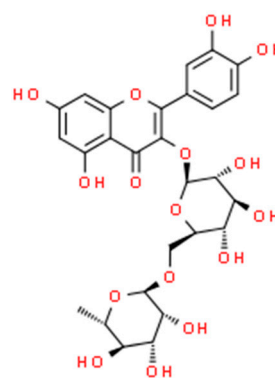

Hesperetin

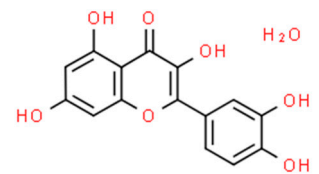

Mandelic acid

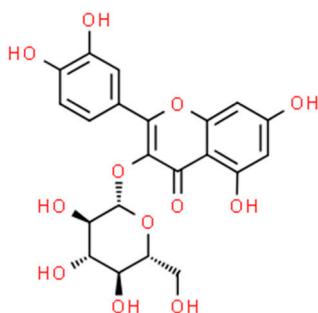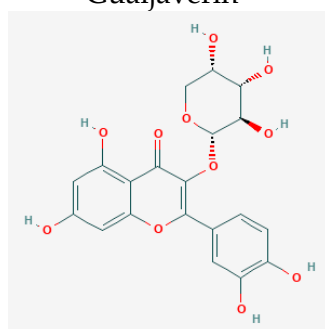

### Others

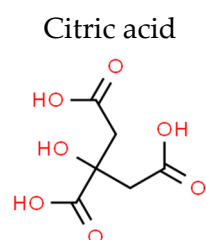

Citric acid

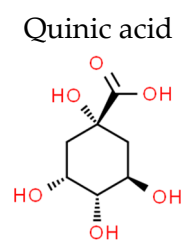

Quinic acid

**Table S1.** Averaged percentage content of phenolic compounds in the studied extracts

|                         | FR <sub>EtOH</sub> | FR <sub>70EtOH</sub> | FR <sub>50EtOH</sub> | FR <sub>H<sub>2</sub>O</sub> | LF <sub>EtOH</sub> | LF <sub>70EtOH</sub> | LF <sub>50EtOH</sub> | LF <sub>H<sub>2</sub>O</sub> | RX <sub>EtOH</sub> | RX <sub>70EtOH</sub> | RX <sub>50EtOH</sub> | RX <sub>H<sub>2</sub>O</sub> |
|-------------------------|--------------------|----------------------|----------------------|------------------------------|--------------------|----------------------|----------------------|------------------------------|--------------------|----------------------|----------------------|------------------------------|
| Chlorogenic acid        | 0.028              | 0.023                | 0.041                | 0.023                        | 0.012              | 0.017                | 0.21                 | 0.15                         | 0                  | 0                    | 0                    | 0                            |
| Neochlorogenic acid     | 0.011              | 0.0089               | 0.028                | 0.029                        | 0.0098             | 0.096                | 0.086                | 0.093                        | 0                  | 0                    | 0                    | 0                            |
| Quercetin glucuronide   | 0.0018             | 0.0015               | 0.0014               | 0.0018                       | 0.0019             | 0.0018               | 0.051                | 0.071                        | 0                  | 0                    | 0                    | 0                            |
| Isoquercetin            | 0.0098             | 0.0075               | 0.0069               | 0.0083                       | 0.021              | 0.015                | 0.017                | 0.028                        | 0.0011             | 0.0014               | 0.0045               | 0.00019                      |
| Kaempferol glucoside    | 0.0015             | 0.0072               | 0.0081               | 0.0055                       | 0.0081             | 0.0092               | 0.089                | 0.11                         | 0                  | 0                    | 0                    | 0                            |
| Quercetin               | 0.012              | 0.0077               | 0.02                 | 0.00088                      | 0.016              | 0.012                | 0.015                | 0.0085                       | 0.00085            | 0.0012               | 0.00069              | 0.00057                      |
| Kaempferol              | 0.0086             | 0.0044               | 0.011                | 0                            | 0.022              | 0.016                | 0.013                | 0.0072                       | 0.00099            | 0.0068               | 0.0047               | 0.0024                       |
| 3-caffeoylglucaric acid | 0.00067            | 0.0016               | 0.0076               | 0.0087                       | 0.018              | 0.025                | 0.1                  | 0.074                        | 0                  | 0                    | 0                    | 0                            |
| 4-caffeoylglucaric acid | 0.0015             | 0.00086              | 0.0055               | 0.0054                       | 0.026              | 0.035                | 0.096                | 0.13                         | 0                  | 0                    | 0                    | 0                            |
| 2-caffeoylglucaric acid | 0.00012            | 0.0036               | 0.0067               | 0.0063                       | 0.031              | 0.038                | 0.14                 | 0.16                         | 0                  | 0                    | 0                    | 0                            |
| 5-caffeoylglucaric acid | 0.00061            | 0.0037               | 0.004                | 0.0055                       | 0.014              | 0.012                | 0.078                | 0.082                        | 0.001              | 0.001                | 0.0068               | 0.0082                       |

**Table S2.** Averaged percentage content of the selected alkaloids in the obtained extracts

|              | FR <sub>EtOH</sub> | FR <sub>70EtOH</sub> | FR <sub>50EtOH</sub> | FR <sub>H<sub>2</sub>O</sub> | LF <sub>EtOH</sub> | LF <sub>70EtOH</sub> | LF <sub>50EtOH</sub> | LF <sub>H<sub>2</sub>O</sub> | RX <sub>EtOH</sub> | RX <sub>70EtOH</sub> | RX <sub>50EtOH</sub> | RX <sub>H<sub>2</sub>O</sub> |
|--------------|--------------------|----------------------|----------------------|------------------------------|--------------------|----------------------|----------------------|------------------------------|--------------------|----------------------|----------------------|------------------------------|
| Berberine    | 0.4322             | 0.2656               | 0.1623               | 0.1456                       | 0.6719             | 0.5724               | 0.5048               | 0.3746                       | 3.332              | 2.518                | 2.1044               | 1.8018                       |
| Palmitine    | 0.0681             | 0.0573               | 0.0537               | 0.0479                       | 0.1843             | 0.1595               | 0.1138               | 0.0811                       | 0.7477             | 0.6674               | 0.7095               | 0.6779                       |
| Jatrorhizine | 0.1779             | 0.2228               | 0.174                | 0.1669                       | 0.7624             | 0.6365               | 0.4343               | 0.3642                       | 1.5985             | 1.3983               | 1.3898               | 1.3625                       |
| Magnoflorine | 0.1356             | 0.2109               | 0.223                | 0.3258                       | 0.6361             | 0.8575               | 0.9296               | 1.3379                       | 0.3088             | 0.4962               | 0.5208               | 0.6455                       |
